# Supplementary material
Source: HighWire-hosted journal article supplement (https://bmjopen.bmj.com/content/12/2/e057842)
Supplement: inline-supplementary-material-2 [file inline-supplementary-material-2.pdf]

## Search Strategy for Ovid MEDLINE

---

### Searches

---

- 1 ((stage or phase or framework) adj2 (IDEAL or development or innovat\*)).ti,ab.
  - 2 IDEAL-D.ti,ab,kf,hw.
  - 3 1 or 2
  - 4 (invasive or incision or cut or percutaneous or puncture or (natural adj1 orifice)).ti,ab,kf,hw.
  - 5 (endoscop\* or colonoscop\* or gastroscop\* or thoracoscop\* or laparoscop\* or arthroscop\* or bronchoscop\*).ti,ab,kf,hw.
  - 6 (catheter or scalpel or surgery or surgical or operat\* or interventional).ti,ab,kf,hw.
  - 7 (device\* or implant\* or prosthesis\* or robot\*).ti,ab,kf,hw.
  - 8 exp Specialties, Surgical/ or exp Endoscopy/ or Radiology, Interventional/ or exp Surgical Procedures, Operative/ or exp "prostheses and implants"/
  - 9 4 or 5 or 6 or 7 or 8
  - 10 (guideline\* or guidance or recommendation\* or proposal\* or regulation\* or advice or framework or typology or model or algorithm or evaluat\* or determin\* or practical method\* or method\* or concept\* or hinder\* or hindrance\* or difficult\* or problem\*).ti,ab.
  - 11 exp Guidelines as Topic/ or exp Classification/
  - 12 10 or 11
  - 13 3 and 9 and 12
  - 14 limit 13 to english language
-
